# Supplementary material
Source: PubMed Central journal article supplement (PMC10766118)
Supplement: NIHMS1953166-supplement-Supplemental_Tables_S1-S4_.pdf [file NIHMS1953166-supplement-Supplemental_Tables_S1-S4_.pdf]

# Phenotypic Variation and Natural Selection at *Catsup*, a Pleiotropic Quantitative Trait Gene in *Drosophila*

Mary Anna Carbone, Katherine W. Jordan,  
Richard F. Lyman, Susan T. Harbison, Jeff Leips,  
Theodore J. Morgan, Maria DeLuca, Philip Awadalla,  
and Trudy F.C. Mackay

Table S1. Variance Components and Quantitative Genetic Parameters from ANOVA of Homozygous Chromosome 2 Substitution Lines

| Parameter       | Life Span           | Starvation Resistance | Abdominal Bristles | Sternopleural Bristles | CV Abdominal Bristles |
|-----------------|---------------------|-----------------------|--------------------|------------------------|-----------------------|
| $\sigma_L^2$    | 39.927 <sup>a</sup> | 139.132 <sup>a</sup>  | 5.283 <sup>a</sup> | 0.913 <sup>a</sup>     | 134.719 <sup>a</sup>  |
| $\sigma_{LS}^2$ | 2.178 <sup>b</sup>  | 26.065 <sup>a</sup>   | 1.576 <sup>a</sup> | 0.039 <sup>b</sup>     | 35.231 <sup>a</sup>   |
| $\sigma_E^2$    | 139.079             | 213.205               | 7.856              | 1.722                  | 111.323               |
| $\sigma_G^2$    | 42.105              | 165.197               | 6.858              | 0.953                  | 169.949               |
| $\sigma_P^2$    | 181.184             | 378.402               | 14.714             | 2.675                  | 281.272               |
| $H^2$           | 0.232               | 0.437                 | 0.466              | 0.356                  | 0.604                 |

<sup>a</sup>  $p < 0.0001$ .

<sup>b</sup>  $p > 0.05$ .

Table S2. Variance Components and Quantitative Genetic Parameters from ANOVA of Locomotor Reactivity

| Parameter        | Estimate           |
|------------------|--------------------|
| $\sigma_L^2$     | 1.253 <sup>a</sup> |
| $\sigma_{LS}^2$  | 0.154 <sup>b</sup> |
| $\sigma_{LC}^2$  | 0.644 <sup>a</sup> |
| $\sigma_{LSC}^2$ | 0.138 <sup>b</sup> |
| $\sigma_E^2$     | 8.579              |
| $\sigma_G^2$     | 2.190              |
| $\sigma_P^2$     | 10.769             |
| $H^2$            | 0.203              |

<sup>a</sup>  $p < 0.0001$ .

<sup>b</sup>  $0.001 < p < 0.01$ .

Table S3. *Catsup* Polymorphisms

| Marker             | Polymorphism <sup>a</sup> | Effect      | Location | <i>q</i> ( <i>N</i> ) <sup>b</sup> |
|--------------------|---------------------------|-------------|----------|------------------------------------|
| M1                 | In-522Del [29 bp]         | Croc        | Promoter | 0.006 (1)                          |
| M2                 | T-470C                    | Zeste       | Promoter | 0.283 (47)                         |
| M3                 | Del-375In [7]             | Elf-1       | Promoter | 0.295 (50)                         |
| M4                 | C-274T                    | Brcz-4      | Promoter | 0.145 (25)                         |
| M5                 | T-249G                    | Elf-1       | Promoter | 0.341 (57)                         |
| M6 <sup>c</sup>    | A-226G                    | A/G         | 5'-UTR   | 0.042 (7)                          |
| M7 <sup>c</sup>    | G-217A                    | G/A         | 5'-UTR   | 0.311 (52)                         |
| M8                 | G-197A                    | G/A         | 5'-UTR   | 0.392 (65)                         |
| M9                 | C10G                      | Gln(4)Glu   | Exon 1   | 0.059 (10)                         |
| M10 <sup>c</sup>   | T28G                      | Cys(10)Gly  | Exon 1   | 0.018 (3)                          |
| M11                | G109T                     | Ala(97)Ser  | Exon 1   | 0.006 (1)                          |
| M12                | G174A                     | Lys(58)Lys  | Exon 1   | 0.018 (3)                          |
| M13                | A194C                     | His(65)Pro  | Exon 1   | 0.464 (77)                         |
| M14                | A215G                     | His(72)Arg  | Exon 1   | 0.097 (16)                         |
| M15 <sup>c</sup>   | In270Del[57 bp]           | aa (91–109) | Exon 1   | 0.061 (10)                         |
| M16                | A366 G                    | Ala(122)Ala | Exon 1   | 0.117 (19)                         |
| M17                | C518T                     | Leu(155)Leu | Exon 2   | 0.012 (2)                          |
| M18 <sup>d</sup>   | G533T                     | Ala(160)Ser | Exon 2   | 0.012 (2)                          |
| M19 <sup>c</sup>   | C599G                     | Leu(182)Val | Exon 2   | 0.037 (6)                          |
| M20                | T625G                     | His(190)Gln | Exon 2   | 0.168 (28)                         |
| M21                | C652T                     | His(199)His | Exon 2   | 0.084 (14)                         |
| M22                | C731A                     | Leu(226)Met | Exon 2   | 0.042 (7)                          |
| M23                | C757T                     | Ala(234)Ala | Exon 2   | 0.036 (6)                          |
| M24 <sup>c,d</sup> | C788A                     | Leu(245)ile | Exon 2   | 0.018 (3)                          |
| M25 <sup>d</sup>   | A790G                     | Leu(245)Leu | Exon 2   | 0.341 (57)                         |
| M26                | G835T                     | Lys(260)Asn | Exon 2   | 0.293 (49)                         |
| M27                | C849T                     | Pro(265)Leu | Exon 2   | 0.006 (1)                          |
| M28 <sup>c</sup>   | A876T                     | Glu(274)Val | Exon 2   | 0.012 (2)                          |
| M29 <sup>d</sup>   | G907A                     | Lys(284)Lys | Exon 2   | 0.048 (8)                          |
| M30 <sup>c,d</sup> | T918C                     | ile(288)Thr | Exon 2   | 0.228 (38)                         |
| M31                | In1411Del [38 bp]         | 38 bp InDel | 3'-UTR   | 0.036 (6)                          |
| M32 <sup>d</sup>   | Del1486In [CT]            | 2 bp InDel  | 3'-UTR   | 0.446 (74)                         |
| M33                | A1492G                    | A/G         | 3'-UTR   | 0.325 (51)                         |

<sup>a</sup> Markers are named according to their position in the aligned sequence, where +1 denotes the translation start site. The common variant is listed first.

<sup>b</sup> Frequency of rare allele (number of lines with rare allele).

<sup>c</sup> Markers exhibiting associations with quantitative traits at the Bonferroni-corrected experiment-wise significance threshold: M6 (environmental variance of abdominal bristle number), M7 (sternopleural bristle number), M10 (abdominal bristle number and environmental variance of abdominal bristle number), M15 (locomotor reactivity), M19 (life span), M24 (abdominal bristle number), M28 (locomotor reactivity), and M30 (sternopleural bristle number).

<sup>d</sup> Markers nominally ( $p < 0.05$ ) associated with starvation stress resistance.

Table S4. Genotype-Phenotype Associations at *Catsup*

| Trait <sup>a</sup> | Marker                        | Effect <sup>b</sup> | Effect/ $\sigma_G$   <sup>c</sup> | Effect/ $\sigma_P$   <sup>c</sup> | $\sigma_M^2$ <sup>d</sup> | $\sigma_M^2/[\sigma_M^2+\sigma_E^2]$ <sup>e</sup> |
|--------------------|-------------------------------|---------------------|-----------------------------------|-----------------------------------|---------------------------|---------------------------------------------------|
| LS                 | C599G                         | -7.53               | 1.16                              | 0.56                              | 28.70                     | 0.32                                              |
| LR                 | In270Del[57 bp]               | 1.27                | 0.86                              | 0.39                              | 0.80                      | 0.24                                              |
|                    | A876T                         | -1.82               | 1.23                              | 0.55                              | 1.70                      | 0.39                                              |
| SB                 | G-217A                        | -0.32               | 0.33                              | 0.20                              | 0.05                      | 0.04                                              |
|                    | T918C                         | 0.38                | 0.39                              | 0.23                              | 0.07                      | 0.05                                              |
| AB                 | T28G                          | 5.66                | 2.16                              | 1.48                              | 16.02                     | 0.66                                              |
|                    | C788A                         | 2.86                | 1.09                              | 0.74                              | 4.05                      | 0.32                                              |
| CV <sub>E</sub> AB | A-226G                        | -13.97              | 1.07                              | 0.83                              | 93.71                     | 0.25                                              |
|                    | T28G                          | -25.11              | 1.93                              | 1.50                              | 295.62                    | 0.52                                              |
| SR                 | H <sub>ALL</sub> <sup>f</sup> | —                   | —                                 | —                                 | 31.41                     | 0.15                                              |

<sup>a</sup> LS, life span; LR, locomotor reactivity; SB, sternopleural bristle number; AB, abdominal bristle number; CV<sub>E</sub> AB, environmental variance in abdominal bristle number; SR, starvation resistance.

<sup>b</sup> Difference in means between common and rare allele.

<sup>c</sup> Absolute values of the effects, expressed in genetic ( $\sigma_G$ ) and phenotypic ( $\sigma_P$ ) standard deviation units.

<sup>d</sup> Variance attributable to the marker.

<sup>e</sup> Fraction of total variance attributable to the marker.

<sup>f</sup> Haplotypes derived from all 87 population haplotypes (H<sub>ALL</sub>).
